# Supplementary figures and images for: Berry Consumption and Sleep in the Adult US General Population: Results from the National Health and Nutrition Examination Survey 2005–2018
Source: MDPI journal article supplement (doi:10.3390/nu15245115), 2023-12-15

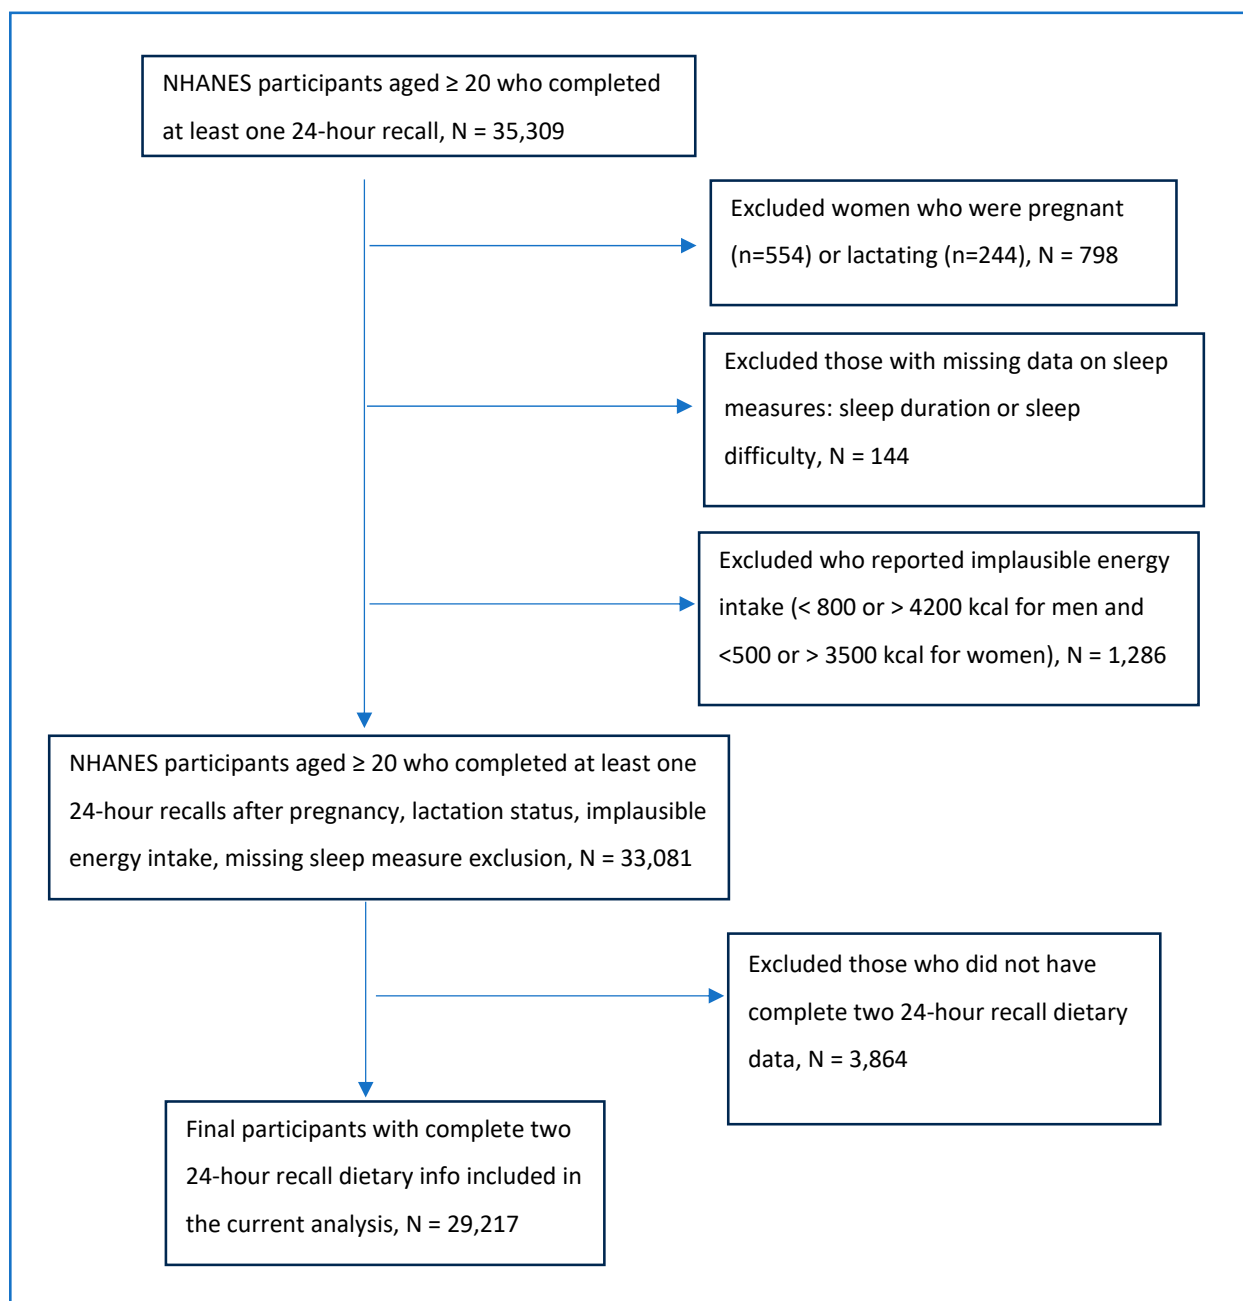

**Figure S1.** Participant flow chart

Supplement: s1 [file s1]
